# Supplementary material for: Alteration of Blood Immune Biomarkers in MCI Patients with Different APOE Genotypes after Cognitive Training: A 1 Year Follow-Up Cohort Study
Source: MDPI journal article supplement (doi:10.3390/ijms241713395), 2023-08-29
Supplement: s1 [file s1]

Table S1. Correlation analysis of all blood immune parameters and scales of MCI patients before cognitive training. Significant relationships are highlighted in red ( $r < -0.7$  or  $r > 0.7$ , and  $p < 0.01$ ).

|                |           | MMSE   | HADS   | MoCa   | EGF   | FGF-2 | Eotaxin | TGF- $\alpha$ | G-CSF  | Flt-3L | GM-CSF | Fractalkine | INF $\alpha$ 2 | IFN $\gamma$ | GRO    | IL-10 | MCP-3 | MDC   | IL-12P70 | sCD40L | IL-1RA | IL-1a | IL-4  | IL-6  | IL-7  | IL-8  | IP-10 | MCP-1 | MIP-1b | TNF $\alpha$ | VEGF |
|----------------|-----------|--------|--------|--------|-------|-------|---------|---------------|--------|--------|--------|-------------|----------------|--------------|--------|-------|-------|-------|----------|--------|--------|-------|-------|-------|-------|-------|-------|-------|--------|--------------|------|
| MMSE           | Pearson r | —      |        |        |       |       |         |               |        |        |        |             |                |              |        |       |       |       |          |        |        |       |       |       |       |       |       |       |        |              |      |
|                | p-value   | —      |        |        |       |       |         |               |        |        |        |             |                |              |        |       |       |       |          |        |        |       |       |       |       |       |       |       |        |              |      |
| HADS           | Pearson r | -0.049 | —      |        |       |       |         |               |        |        |        |             |                |              |        |       |       |       |          |        |        |       |       |       |       |       |       |       |        |              |      |
|                | p-value   | 0.606  | —      |        |       |       |         |               |        |        |        |             |                |              |        |       |       |       |          |        |        |       |       |       |       |       |       |       |        |              |      |
| MoCa           | Pearson r | 0.479  | -0.083 | —      |       |       |         |               |        |        |        |             |                |              |        |       |       |       |          |        |        |       |       |       |       |       |       |       |        |              |      |
|                | p-value   | <.001  | 0.379  | —      |       |       |         |               |        |        |        |             |                |              |        |       |       |       |          |        |        |       |       |       |       |       |       |       |        |              |      |
| EGF            | Pearson r | 0.188  | -0.088 | 0.010  | —     |       |         |               |        |        |        |             |                |              |        |       |       |       |          |        |        |       |       |       |       |       |       |       |        |              |      |
|                | p-value   | 0.042  | 0.352  | 0.912  | —     |       |         |               |        |        |        |             |                |              |        |       |       |       |          |        |        |       |       |       |       |       |       |       |        |              |      |
| FGF-2          | Pearson r | -0.010 | -0.085 | -0.046 | 0.436 | —     |         |               |        |        |        |             |                |              |        |       |       |       |          |        |        |       |       |       |       |       |       |       |        |              |      |
|                | p-value   | 0.922  | 0.409  | 0.652  | <.001 | —     |         |               |        |        |        |             |                |              |        |       |       |       |          |        |        |       |       |       |       |       |       |       |        |              |      |
| Eotaxin        | Pearson r | -0.050 | -0.096 | -0.135 | 0.281 | 0.069 | —       |               |        |        |        |             |                |              |        |       |       |       |          |        |        |       |       |       |       |       |       |       |        |              |      |
|                | p-value   | 0.593  | 0.310  | 0.147  | 0.002 | 0.498 | —       |               |        |        |        |             |                |              |        |       |       |       |          |        |        |       |       |       |       |       |       |       |        |              |      |
| TGF- $\alpha$  | Pearson r | 0.122  | -0.048 | -0.007 | 0.090 | 0.340 | 0.177   | —             |        |        |        |             |                |              |        |       |       |       |          |        |        |       |       |       |       |       |       |       |        |              |      |
|                | p-value   | 0.270  | 0.672  | 0.951  | 0.415 | 0.002 | 0.108   | —             |        |        |        |             |                |              |        |       |       |       |          |        |        |       |       |       |       |       |       |       |        |              |      |
| G-CSF          | Pearson r | 0.014  | -0.125 | -0.073 | 0.519 | 0.950 | 0.162   | 0.390         | —      |        |        |             |                |              |        |       |       |       |          |        |        |       |       |       |       |       |       |       |        |              |      |
|                | p-value   | 0.903  | 0.271  | 0.522  | <.001 | <.001 | 0.153   | 0.001         | —      |        |        |             |                |              |        |       |       |       |          |        |        |       |       |       |       |       |       |       |        |              |      |
| Flt-3L         | Pearson r | -0.064 | -0.170 | -0.014 | 0.389 | 0.821 | 0.214   | 0.181         | 0.836  | —      |        |             |                |              |        |       |       |       |          |        |        |       |       |       |       |       |       |       |        |              |      |
|                | p-value   | 0.571  | 0.135  | 0.902  | <.001 | <.001 | 0.056   | 0.115         | <.001  | —      |        |             |                |              |        |       |       |       |          |        |        |       |       |       |       |       |       |       |        |              |      |
| GM-CSF         | Pearson r | 0.003  | -0.133 | -0.034 | 0.485 | 0.949 | 0.132   | 0.391         | 0.984  | 0.857  | —      |             |                |              |        |       |       |       |          |        |        |       |       |       |       |       |       |       |        |              |      |
|                | p-value   | 0.977  | 0.248  | 0.765  | <.001 | <.001 | 0.249   | <.001         | <.001  | <.001  | —      |             |                |              |        |       |       |       |          |        |        |       |       |       |       |       |       |       |        |              |      |
| Fractalkine    | Pearson r | 0.007  | -0.119 | -0.057 | 0.495 | 0.949 | 0.122   | 0.354         | 0.983  | 0.842  | 0.990  | —           |                |              |        |       |       |       |          |        |        |       |       |       |       |       |       |       |        |              |      |
|                | p-value   | 0.949  | 0.264  | 0.595  | <.001 | <.001 | 0.252   | 0.002         | <.001  | <.001  | <.001  | —           |                |              |        |       |       |       |          |        |        |       |       |       |       |       |       |       |        |              |      |
| INF $\alpha$ 2 | Pearson r | 0.045  | -0.121 | -0.024 | 0.470 | 0.919 | 0.156   | 0.274         | 0.921  | 0.762  | 0.913  | 0.940       | —              |              |        |       |       |       |          |        |        |       |       |       |       |       |       |       |        |              |      |
|                | p-value   | 0.677  | 0.264  | 0.825  | <.001 | <.001 | 0.146   | 0.020         | <.001  | <.001  | <.001  | <.001       | <.001          | —            |        |       |       |       |          |        |        |       |       |       |       |       |       |       |        |              |      |
| IFN $\gamma$   | Pearson r | -0.050 | 0.021  | -0.244 | 0.267 | 0.617 | 0.162   | 0.258         | 0.561  | 0.523  | 0.552  | 0.600       | 0.555          | —            |        |       |       |       |          |        |        |       |       |       |       |       |       |       |        |              |      |
|                | p-value   | 0.633  | 0.844  | 0.018  | 0.010 | <.001 | 0.122   | 0.022         | <.001  | <.001  | <.001  | <.001       | <.001          | —            |        |       |       |       |          |        |        |       |       |       |       |       |       |       |        |              |      |
| GRO            | Pearson r | 0.269  | -0.037 | 0.109  | 0.337 | 0.029 | 0.131   | 0.194         | -0.002 | 0.074  | 0.000  | 0.006       | -0.011         | -0.038       | —      |       |       |       |          |        |        |       |       |       |       |       |       |       |        |              |      |
|                | p-value   | 0.004  | 0.695  | 0.244  | <.001 | 0.778 | 0.160   | 0.076         | 0.985  | 0.517  | 0.997  | 0.953       | 0.921          | 0.719        | —      |       |       |       |          |        |        |       |       |       |       |       |       |       |        |              |      |
| IL-10          | Pearson r | 0.114  | -0.165 | 0.043  | 0.273 | 0.690 | 0.158   | 0.159         | 0.711  | 0.572  | 0.702  | 0.712       | 0.759          | 0.468        | 0.006  | —     |       |       |          |        |        |       |       |       |       |       |       |       |        |              |      |
|                | p-value   | 0.268  | 0.111  | 0.681  | 0.007 | <.001 | 0.125   | 0.158         | <.001  | <.001  | <.001  | <.001       | <.001          | <.001        | 0.955  | —     |       |       |          |        |        |       |       |       |       |       |       |       |        |              |      |
| MCP-3          | Pearson r | 0.007  | 0.019  | -0.099 | 0.239 | 0.554 | -0.024  | 0.179         | 0.565  | 0.478  | 0.542  | 0.569       | 0.511          | 0.539        | -0.122 | 0.498 | —     |       |          |        |        |       |       |       |       |       |       |       |        |              |      |
|                | p-value   | 0.989  | 0.925  | 0.001  | 0.001 | 0.001 | 0.989   | 0.989         | 0.001  | 0.001  | 0.001  | 0.001       | 0.001          | 0.001        | 0.001  | 0.001 | 0.001 | 0.001 | 0.001    | 0.001  | 0.001  | 0.001 | 0.001 | 0.001 | 0.001 | 0.001 | 0.001 | 0.001 | 0.001  | 0.001        |      |

[illegible]

Table S2. Correlation analysis of all blood immune parameters and scales of MCI patients after cognitive training. Significant relationships are highlighted in red ( $r < -0.7$  or  $r > 0.7$ , and  $p < 0.01$ ).

|             |           | MoCA   | MMSE   | HADS   | EGF   | FGF-2  | Eotaxin | TGF-<br>α | G-<br>CSF | Flt-3L | GM-<br>CSF | Fractalkine | INFα2  | IFNγ  | GRO   | IL-10 | MCP-3 | MDC | IL-12P70 | sCD40L | IL-1RA | IL-1α | IL-4 | IL-6 | IL-7 | IL-8 | IP-10 | MCP-1 | MIP-1b | TNFα | VEGF |
|-------------|-----------|--------|--------|--------|-------|--------|---------|-----------|-----------|--------|------------|-------------|--------|-------|-------|-------|-------|-----|----------|--------|--------|-------|------|------|------|------|-------|-------|--------|------|------|
| MoCA        | Pearson r | —      |        |        |       |        |         |           |           |        |            |             |        |       |       |       |       |     |          |        |        |       |      |      |      |      |       |       |        |      |      |
|             | p-value   | —      |        |        |       |        |         |           |           |        |            |             |        |       |       |       |       |     |          |        |        |       |      |      |      |      |       |       |        |      |      |
| MMSE        | Pearson r | 0.545  | —      |        |       |        |         |           |           |        |            |             |        |       |       |       |       |     |          |        |        |       |      |      |      |      |       |       |        |      |      |
|             | p-value   | <.001  | —      |        |       |        |         |           |           |        |            |             |        |       |       |       |       |     |          |        |        |       |      |      |      |      |       |       |        |      |      |
| HADS        | Pearson r | 0.014  | -0.006 | —      |       |        |         |           |           |        |            |             |        |       |       |       |       |     |          |        |        |       |      |      |      |      |       |       |        |      |      |
|             | p-value   | 0.869  | 0.947  | —      |       |        |         |           |           |        |            |             |        |       |       |       |       |     |          |        |        |       |      |      |      |      |       |       |        |      |      |
| EGF         | Pearson r | -0.007 | 0.008  | -0.089 | —     |        |         |           |           |        |            |             |        |       |       |       |       |     |          |        |        |       |      |      |      |      |       |       |        |      |      |
|             | p-value   | 0.935  | 0.929  | 0.306  | —     |        |         |           |           |        |            |             |        |       |       |       |       |     |          |        |        |       |      |      |      |      |       |       |        |      |      |
| FGF-2       | Pearson r | -0.016 | -0.042 | -0.150 | 0.131 | —      |         |           |           |        |            |             |        |       |       |       |       |     |          |        |        |       |      |      |      |      |       |       |        |      |      |
|             | p-value   | 0.864  | 0.655  | 0.112  | 0.159 | —      |         |           |           |        |            |             |        |       |       |       |       |     |          |        |        |       |      |      |      |      |       |       |        |      |      |
| Eotaxin     | Pearson r | -0.236 | -0.323 | -0.094 | 0.066 | -0.021 | —       |           |           |        |            |             |        |       |       |       |       |     |          |        |        |       |      |      |      |      |       |       |        |      |      |
|             | p-value   | 0.006  | <.001  | 0.285  | 0.445 | 0.826  | —       |           |           |        |            |             |        |       |       |       |       |     |          |        |        |       |      |      |      |      |       |       |        |      |      |
| TGF-α       | Pearson r | -0.037 | 0.083  | -0.151 | 0.115 | 0.600  | 0.017   | —         |           |        |            |             |        |       |       |       |       |     |          |        |        |       |      |      |      |      |       |       |        |      |      |
|             | p-value   | 0.685  | 0.362  | 0.095  | 0.202 | <.001  | 0.848   | —         |           |        |            |             |        |       |       |       |       |     |          |        |        |       |      |      |      |      |       |       |        |      |      |
| G-CSF       | Pearson r | -0.020 | -0.008 | -0.230 | 0.132 | 0.669  | -0.008  | 0.779     | —         |        |            |             |        |       |       |       |       |     |          |        |        |       |      |      |      |      |       |       |        |      |      |
|             | p-value   | 0.836  | 0.936  | 0.017  | 0.172 | <.001  | 0.932   | <.001     | —         |        |            |             |        |       |       |       |       |     |          |        |        |       |      |      |      |      |       |       |        |      |      |
| Flt-3L      | Pearson r | -0.133 | -0.045 | -0.207 | 0.221 | 0.407  | 0.098   | 0.462     | 0.478     | —      |            |             |        |       |       |       |       |     |          |        |        |       |      |      |      |      |       |       |        |      |      |
|             | p-value   | 0.147  | 0.625  | 0.024  | 0.015 | <.001  | 0.287   | <.001     | <.001     | —      |            |             |        |       |       |       |       |     |          |        |        |       |      |      |      |      |       |       |        |      |      |
| GM-CSF      | Pearson r | 0.029  | 0.072  | -0.179 | 0.108 | 0.692  | 0.017   | 0.847     | 0.822     | 0.461  | —          |             |        |       |       |       |       |     |          |        |        |       |      |      |      |      |       |       |        |      |      |
|             | p-value   | 0.762  | 0.461  | 0.064  | 0.261 | <.001  | 0.857   | <.001     | <.001     | <.001  | —          |             |        |       |       |       |       |     |          |        |        |       |      |      |      |      |       |       |        |      |      |
| Fractalkine | Pearson r | -0.073 | 0.075  | -0.189 | 0.188 | 0.725  | 0.069   | 0.857     | 0.688     | 0.381  | 0.792      | —           |        |       |       |       |       |     |          |        |        |       |      |      |      |      |       |       |        |      |      |
|             | p-value   | 0.484  | 0.474  | 0.068  | 0.066 | <.001  | 0.505   | <.001     | <.001     | <.001  | <.001      | —           |        |       |       |       |       |     |          |        |        |       |      |      |      |      |       |       |        |      |      |
| INFα2       | Pearson r | -0.052 | -0.005 | -0.171 | 0.129 | 0.799  | 0.054   | 0.444     | 0.468     | 0.286  | 0.429      | 0.587       | —      |       |       |       |       |     |          |        |        |       |      |      |      |      |       |       |        |      |      |
|             | p-value   | 0.622  | 0.958  | 0.103  | 0.214 | <.001  | 0.607   | <.001     | <.001     | 0.008  | <.001      | <.001       | —      |       |       |       |       |     |          |        |        |       |      |      |      |      |       |       |        |      |      |
| IFNγ        | Pearson r | -0.260 | -0.196 | -0.015 | 0.199 | 0.697  | 0.062   | 0.280     | 0.347     | 0.290  | 0.251      | 0.466       | 0.661  | —     |       |       |       |     |          |        |        |       |      |      |      |      |       |       |        |      |      |
|             | p-value   | 0.009  | 0.052  | 0.882  | 0.047 | <.001  | 0.540   | 0.007     | 0.001     | 0.005  | 0.019      | <.001       | <.001  | —     |       |       |       |     |          |        |        |       |      |      |      |      |       |       |        |      |      |
| GRO         | Pearson r | -0.097 | -0.107 | -0.090 | 0.382 | 0.016  | 0.192   | -0.065    | -0.092    | 0.099  | -0.048     | -0.030      | -0.017 | 0.027 | —     |       |       |     |          |        |        |       |      |      |      |      |       |       |        |      |      |
|             | p-value   | 0.265  | 0.218  | 0.305  | <.001 | 0.866  | 0.025   | 0.469     | 0.344     | 0.276  | 0.622      | 0.772       | 0.870  | 0.786 | —     |       |       |     |          |        |        |       |      |      |      |      |       |       |        |      |      |
| IL-10       | Pearson r | -0.018 | -0.035 | -0.061 | 0.103 | 0.663  | 0.064   | 0.186     | 0.220     | 0.112  | 0.241      | 0.431       | 0.833  | 0.601 | 0.035 | —     |       |     |          |        |        |       |      |      |      |      |       |       |        |      |      |
|             | p-value   | 0.839  | 0.691  | 0.493  | 0.239 | <.001  | 0.470   | 0.041     | 0.024     | 0.228  | 0.013      | <.001       | <.001  | <.001 | 0.687 | —     |       |     |          |        |        |       |      |      |      |      |       |       |        |      |      |
| MCP-3       | Pearson r | -0.119 | -0.142 | -0.051 | 0.197 | 0.490  | 0.009   | 0.393     | 0.425     | 0.277  | 0.499      | 0.503       | 0.331  | 0.487 | 0.030 | 0.227 | —     |     |          |        |        |       |      |      |      |      |       |       |        |      |      |
|             | p-value   | 0.187  | 0.116  | 0.579  | 0.027 | <.001  | 0.924   | <.001     | <.001     | 0.003  | <.001      | <.001       | <.001  | 0.001 | <.001 | 0.737 | 0.011 | —   |          |        |        |       |      |      |      |      |       |       |        |      |      |

[illegible]

Table S3. Correlation analysis of difference in concentrations of immune parameters between the first and second visits in MCI patients. Significant relationships are highlighted in red ( $r < -0.7$  or  $r > 0.7$ , and  $p < 0.01$ ).

|             |           | EGF    | FGF-2  | Eotaxin | TGF-α  | G-CSF  | Flt-3L | GM-CSF | Fractalkine | INFα2  | IFNγ   | GRO   | IL-10  | MCP-3  | MDC    | IL-12P70 | sCD40L | IL-1RA | IL-1α | IL-4 | IL-6 | IL-7 | IL-8 | IP-10 | MCP-1 | MIP-1b | TNFα | VEGF |
|-------------|-----------|--------|--------|---------|--------|--------|--------|--------|-------------|--------|--------|-------|--------|--------|--------|----------|--------|--------|-------|------|------|------|------|-------|-------|--------|------|------|
| EGF         | Pearson r | —      |        |         |        |        |        |        |             |        |        |       |        |        |        |          |        |        |       |      |      |      |      |       |       |        |      |      |
|             | p-value   | —      |        |         |        |        |        |        |             |        |        |       |        |        |        |          |        |        |       |      |      |      |      |       |       |        |      |      |
| FGF-2       | Pearson r | 0.324  | —      |         |        |        |        |        |             |        |        |       |        |        |        |          |        |        |       |      |      |      |      |       |       |        |      |      |
|             | p-value   | 0.002  | —      |         |        |        |        |        |             |        |        |       |        |        |        |          |        |        |       |      |      |      |      |       |       |        |      |      |
| Eotaxin     | Pearson r | 0.259  | 0.137  | —       |        |        |        |        |             |        |        |       |        |        |        |          |        |        |       |      |      |      |      |       |       |        |      |      |
|             | p-value   | 0.004  | 0.203  | —       |        |        |        |        |             |        |        |       |        |        |        |          |        |        |       |      |      |      |      |       |       |        |      |      |
| TGF-α       | Pearson r | 0.199  | 0.293  | 0.387   | —      |        |        |        |             |        |        |       |        |        |        |          |        |        |       |      |      |      |      |       |       |        |      |      |
|             | p-value   | 0.077  | 0.019  | < .001  | —      |        |        |        |             |        |        |       |        |        |        |          |        |        |       |      |      |      |      |       |       |        |      |      |
| G-CSF       | Pearson r | 0.373  | 0.873  | 0.214   | 0.494  | —      |        |        |             |        |        |       |        |        |        |          |        |        |       |      |      |      |      |       |       |        |      |      |
|             | p-value   | 0.001  | < .001 | 0.078   | < .001 | —      |        |        |             |        |        |       |        |        |        |          |        |        |       |      |      |      |      |       |       |        |      |      |
| Flt-3L      | Pearson r | 0.336  | 0.734  | 0.434   | 0.517  | 0.738  | —      |        |             |        |        |       |        |        |        |          |        |        |       |      |      |      |      |       |       |        |      |      |
|             | p-value   | 0.004  | < .001 | < .001  | < .001 | < .001 | —      |        |             |        |        |       |        |        |        |          |        |        |       |      |      |      |      |       |       |        |      |      |
| GM-CSF      | Pearson r | 0.373  | 0.853  | 0.309   | 0.744  | 0.974  | 0.816  | —      |             |        |        |       |        |        |        |          |        |        |       |      |      |      |      |       |       |        |      |      |
|             | p-value   | 0.002  | < .001 | 0.013   | < .001 | < .001 | < .001 | —      |             |        |        |       |        |        |        |          |        |        |       |      |      |      |      |       |       |        |      |      |
| Fractalkine | Pearson r | 0.378  | 0.807  | 0.291   | 0.901  | 0.894  | 0.736  | 0.927  | —           |        |        |       |        |        |        |          |        |        |       |      |      |      |      |       |       |        |      |      |
|             | p-value   | 0.002  | < .001 | 0.018   | < .001 | < .001 | < .001 | < .001 | —           |        |        |       |        |        |        |          |        |        |       |      |      |      |      |       |       |        |      |      |
| INFα2       | Pearson r | 0.359  | 0.818  | 0.254   | 0.385  | 0.629  | 0.558  | 0.605  | 0.663       | —      |        |       |        |        |        |          |        |        |       |      |      |      |      |       |       |        |      |      |
|             | p-value   | 0.003  | < .001 | 0.038   | 0.004  | < .001 | < .001 | < .001 | < .001      | —      |        |       |        |        |        |          |        |        |       |      |      |      |      |       |       |        |      |      |
| IFNγ        | Pearson r | 0.266  | 0.811  | 0.163   | 0.457  | 0.615  | 0.507  | 0.601  | 0.687       | 0.967  | —      |       |        |        |        |          |        |        |       |      |      |      |      |       |       |        |      |      |
|             | p-value   | 0.034  | < .001 | 0.202   | < .001 | < .001 | < .001 | < .001 | < .001      | < .001 | —      |       |        |        |        |          |        |        |       |      |      |      |      |       |       |        |      |      |
| GRO         | Pearson r | 0.507  | 0.128  | 0.369   | 0.068  | 0.145  | 0.401  | 0.185  | 0.129       | 0.180  | 0.132  | —     |        |        |        |          |        |        |       |      |      |      |      |       |       |        |      |      |
|             | p-value   | < .001 | 0.234  | < .001  | 0.553  | 0.228  | < .001 | 0.139  | 0.295       | 0.139  | 0.294  | —     |        |        |        |          |        |        |       |      |      |      |      |       |       |        |      |      |
| IL-10       | Pearson r | 0.219  | 0.660  | 0.245   | 0.222  | 0.457  | 0.462  | 0.470  | 0.525       | 0.855  | 0.831  | 0.130 | —      |        |        |          |        |        |       |      |      |      |      |       |       |        |      |      |
|             | p-value   | 0.033  | < .001 | 0.017   | 0.054  | < .001 | < .001 | < .001 | < .001      | < .001 | < .001 | 0.206 | —      |        |        |          |        |        |       |      |      |      |      |       |       |        |      |      |
| MCP-3       | Pearson r | 0.438  | 0.641  | 0.253   | 0.330  | 0.560  | 0.658  | 0.557  | 0.568       | 0.513  | 0.490  | 0.269 | 0.327  | —      |        |          |        |        |       |      |      |      |      |       |       |        |      |      |
|             | p-value   | < .001 | < .001 | 0.015   | 0.005  | < .001 | < .001 | < .001 | < .001      | < .001 | < .001 | 0.009 | 0.003  | —      |        |          |        |        |       |      |      |      |      |       |       |        |      |      |
| MDC         | Pearson r | 0.288  | 0.225  | 0.181   | 0.150  | 0.200  | 0.131  | 0.178  | 0.210       | 0.455  | 0.592  | 0.223 | 0.415  | 0.219  | —      |          |        |        |       |      |      |      |      |       |       |        |      |      |
|             | p-value   | 0.001  | 0.034  | 0.038   | 0.186  | 0.096  | 0.274  | 0.159  | 0.087       | < .001 | < .001 | 0.010 | < .001 | 0.034  | —      |          |        |        |       |      |      |      |      |       |       |        |      |      |
| IL-12P70    | Pearson r | 0.336  | 0.797  | 0.297   | 0.506  | 0.715  | 0.581  | 0.680  | 0.738       | 0.900  | 0.909  | 0.147 | 0.864  | 0.440  | 0.438  | —        |        |        |       |      |      |      |      |       |       |        |      |      |
|             | p-value   | 0.005  | < .001 | 0.015   | < .001 | < .001 | < .001 | < .001 | < .001      | < .001 | < .001 | 0.232 | < .001 | < .001 | < .001 | —        |        |        |       |      |      |      |      |       |       |        |      |      |
| sCD40L      | Pearson r | 0.173  | 0.098  | 0.320   | 0.411  | 0.099  | 0.367  | 0.188  | 0.227       | 0.200  | 0.070  | 0.227 | 0.096  | 0.179  | 0.179  | 0.159    | —      |        |       |      |      |      |      |       |       |        |      |      |
|             | p-value   | 0.082  | 0.415  | < .001  | 0.001  | 0.463  | 0.005  | 0.173  | 0.098       | 0.148  | 0.617  | 0.015 | 0.404  | 0.124  | 0.056  | 0.265    | —      |        |       |      |      |      |      |       |       |        |      |      |
| IL-1RA      | Pearson r | 0.345  | 0.884  | 0.258   | 0.699  | 0.970  | 0.744  | 0.992  | 0.928       | 0.653  | 0.649  | 0.166 | 0.491  | 0.588  | 0.197  | 0.710    | 0.198  | —      |       |      |      |      |      |       |       |        |      |      |

|        |           |        |        |        |        |        |        |        |        |        |        |        |        |        |        |        |        |        |        |        |        |        |        |        |        |       |        |
|--------|-----------|--------|--------|--------|--------|--------|--------|--------|--------|--------|--------|--------|--------|--------|--------|--------|--------|--------|--------|--------|--------|--------|--------|--------|--------|-------|--------|
| IL-1a  | p-value   | < .001 | < .001 | 0.015  | < .001 | < .001 | < .001 | < .001 | < .001 | < .001 | 0.118  | < .001 | < .001 | 0.062  | < .001 | 0.095  | —      |        |        |        |        |        |        |        |        |       |        |
|        | Pearson r | 0.439  | 0.688  | 0.350  | 0.812  | 0.795  | 0.694  | 0.831  | 0.889  | 0.629  | 0.584  | 0.298  | 0.421  | 0.654  | 0.274  | 0.682  | 0.345  | 0.692  | —      |        |        |        |        |        |        |       |        |
| IL-4   | p-value   | < .001 | < .001 | 0.002  | < .001 | < .001 | < .001 | < .001 | < .001 | < .001 | 0.010  | < .001 | < .001 | 0.017  | < .001 | 0.006  | < .001 | —      |        |        |        |        |        |        |        |       |        |
|        | Pearson r | 0.437  | 0.635  | 0.269  | 0.622  | 0.768  | 0.578  | 0.782  | 0.843  | 0.584  | 0.557  | 0.281  | 0.347  | 0.654  | 0.258  | 0.594  | 0.237  | 0.636  | 0.950  | —      |        |        |        |        |        |       |        |
| IL-6   | p-value   | < .001 | < .001 | 0.007  | < .001 | < .001 | < .001 | < .001 | < .001 | < .001 | 0.005  | < .001 | < .001 | 0.010  | < .001 | 0.034  | < .001 | < .001 | —      |        |        |        |        |        |        |       |        |
|        | Pearson r | 0.532  | 0.625  | 0.541  | 0.829  | 0.731  | 0.766  | 0.738  | 0.849  | 0.611  | 0.564  | 0.363  | 0.380  | 0.698  | 0.276  | 0.649  | 0.419  | 0.636  | 0.972  | 0.943  | —      |        |        |        |        |       |        |
| IL-7   | p-value   | < .001 | < .001 | < .001 | < .001 | < .001 | < .001 | < .001 | < .001 | < .001 | 0.011  | 0.012  | < .001 | 0.060  | < .001 | 0.008  | < .001 | < .001 | < .001 | —      |        |        |        |        |        |       |        |
|        | Pearson r | 0.442  | 0.676  | 0.488  | 0.766  | 0.704  | 0.779  | 0.747  | 0.831  | 0.683  | 0.650  | 0.332  | 0.564  | 0.542  | 0.315  | 0.727  | 0.364  | 0.725  | 0.823  | 0.715  | 0.865  | —      |        |        |        |       |        |
| IL-8   | p-value   | < .001 | < .001 | < .001 | < .001 | < .001 | < .001 | < .001 | < .001 | < .001 | 0.002  | < .001 | < .001 | 0.004  | < .001 | 0.002  | < .001 | < .001 | < .001 | < .001 | —      |        |        |        |        |       |        |
|        | Pearson r | 0.402  | 0.567  | 0.398  | 0.800  | 0.605  | 0.716  | 0.678  | 0.762  | 0.611  | 0.562  | 0.323  | 0.397  | 0.648  | 0.278  | 0.626  | 0.359  | 0.615  | 0.924  | 0.848  | 0.964  | 0.847  | —      |        |        |       |        |
| IP-10  | p-value   | < .001 | < .001 | < .001 | < .001 | < .001 | < .001 | < .001 | < .001 | < .001 | < .001 | < .001 | < .001 | < .001 | 0.002  | < .001 | < .001 | < .001 | < .001 | < .001 | < .001 | —      |        |        |        |       |        |
|        | Pearson r | -0.332 | 0.149  | -0.054 | -0.315 | -0.109 | 0.324  | -0.040 | -0.123 | -0.008 | 0.089  | -0.151 | 0.081  | 0.074  | -0.096 | 0.066  | -0.015 | -0.005 | -0.216 | -0.170 | -0.275 | -0.154 | -0.165 | —      |        |       |        |
| MCP-1  | p-value   | < .001 | 0.160  | 0.538  | 0.004  | 0.364  | 0.005  | 0.749  | 0.318  | 0.948  | 0.482  | 0.081  | 0.430  | 0.475  | 0.266  | 0.592  | 0.872  | 0.963  | 0.060  | 0.090  | 0.059  | 0.161  | 0.063  | —      |        |       |        |
|        | Pearson r | 0.289  | 0.151  | 0.482  | 0.535  | 0.160  | 0.389  | 0.311  | 0.329  | 0.301  | 0.177  | 0.432  | 0.249  | 0.334  | 0.334  | 0.311  | 0.393  | 0.279  | 0.484  | 0.345  | 0.561  | 0.506  | 0.535  | -0.069 | —      |       |        |
| MIP-1b | p-value   | 0.001  | 0.155  | < .001 | < .001 | 0.182  | < .001 | 0.012  | 0.006  | 0.012  | 0.159  | < .001 | 0.014  | < .001 | < .001 | 0.010  | < .001 | 0.007  | < .001 | < .001 | < .001 | < .001 | < .001 | 0.421  | —      |       |        |
|        | Pearson r | 0.071  | 0.115  | 0.346  | 0.219  | 0.056  | 0.477  | 0.166  | 0.169  | 0.062  | -0.006 | 0.343  | 0.219  | 0.407  | 0.091  | 0.130  | 0.342  | 0.122  | 0.034  | -0.009 | 0.092  | 0.407  | 0.197  | 0.330  | 0.380  | —     |        |
| TNFα   | p-value   | 0.439  | 0.280  | < .001 | 0.051  | 0.645  | < .001 | 0.186  | 0.167  | 0.615  | 0.963  | < .001 | 0.031  | < .001 | 0.297  | 0.292  | < .001 | 0.251  | 0.769  | 0.928  | 0.534  | < .001 | 0.027  | < .001 | < .001 | —     |        |
|        | Pearson r | 0.209  | 0.560  | 0.266  | 0.539  | 0.351  | 0.363  | 0.368  | 0.513  | 0.902  | 0.891  | 0.138  | 0.791  | 0.323  | 0.350  | 0.827  | 0.230  | 0.403  | 0.514  | 0.424  | 0.516  | 0.626  | 0.538  | -0.037 | 0.310  | 0.220 | —      |
| VEGF   | p-value   | 0.033  | < .001 | 0.005  | < .001 | 0.003  | 0.002  | 0.003  | < .001 | < .001 | < .001 | 0.150  | < .001 | 0.002  | < .001 | < .001 | 0.027  | < .001 | < .001 | < .001 | < .001 | < .001 | < .001 | 0.696  | < .001 | 0.020 | —      |
|        | Pearson r | 0.391  | 0.807  | 0.286  | 0.610  | 0.900  | 0.788  | 0.928  | 0.884  | 0.653  | 0.663  | 0.260  | 0.471  | 0.641  | 0.318  | 0.692  | 0.264  | 0.889  | 0.847  | 0.799  | 0.826  | 0.800  | 0.800  | -0.110 | 0.455  | 0.123 | 0.399  |
|        | p-value   | < .001 | < .001 | 0.012  | < .001 | < .001 | < .001 | < .001 | < .001 | < .001 | 0.023  | < .001 | < .001 | 0.005  | < .001 | 0.036  | < .001 | < .001 | < .001 | < .001 | < .001 | < .001 | < .001 | 0.342  | < .001 | 0.287 | < .001 |

Table S4. Evaluation of the relationship between the concentration of immune parameters before and after cognitive training in patients with different APOE genotypes. ANOVA was used for analysis. Significant differences in p-values are highlighted in bold.

| Immune parameters / Scales | APOE genotypes |              |              |              |
|----------------------------|----------------|--------------|--------------|--------------|
|                            | First visit    |              | Second visit |              |
|                            | <i>F</i>       | <i>p</i>     | <i>F</i>     | <i>p</i>     |
| EGF                        | 0.60           | 0.66         | 1.87         | 0.12         |
| FGF-2                      | 3.83           | <b>0.007</b> | 0.73         | 0.57         |
| Eotaxin                    | 0.58           | 0.68         | 0.20         | 0.94         |
| TGF-a                      | 2.23           | 0.07         | 0.29         | 0.88         |
| G-CSF                      | 1.82           | 0.13         | 0.73         | 0.58         |
| Fractalkine                | 0.88           | 0.48         | 1.07         | 0.37         |
| INFa2                      | 0.17           | 0.95         | 0.44         | 0.78         |
| IFNy                       | 0.30           | 0.87         | 0.40         | 0.81         |
| GRO                        | 0.33           | 0.86         | 1.03         | 0.39         |
| IL-10                      | 0.17           | 0.95         | 0.27         | 0.89         |
| MCP-3                      | 0.35           | 0.85         | 0.85         | 0.49         |
| MDC                        | 0.44           | 0.78         | 1.10         | 0.36         |
| IL-12P70                   | 0.25           | 0.91         | 0.34         | 0.85         |
| sCD40L                     | 0.38           | 0.82         | 0.31         | 0.87         |
| IL-1RA                     | 1.60           | 0.18         | 0.71         | 0.59         |
| IL-1a                      | 1.55           | 0.19         | 2.17         | 0.08         |
| IL-4                       | 1.16           | 0.33         | 0.53         | 0.71         |
| IL-6                       | 1.22           | 0.32         | 0.78         | 0.54         |
| IL-7                       | 0.25           | 0.91         | 0.78         | 0.54         |
| IL-8                       | 1.19           | 0.32         | 0.53         | 0.71         |
| IP-10                      | 0.15           | 0.96         | 2.93         | <b>0.02</b>  |
| MCP-1                      | 0.35           | 0.84         | 2.08         | 0.09         |
| MIP-1b                     | 0.45           | 0.77         | 0.52         | 0.72         |
| TNFa                       | 0.46           | 0.76         | 0.44         | 0.78         |
| VEGF                       | 4.50           | <b>0.002</b> | 0.94         | 0.44         |
| Flt-3L                     | 1.12           | 0.35         | 0.38         | 0.82         |
| GM-CSF                     | 0.94           | 0.42         | 0.49         | 0.74         |
| HADS                       | 1.16           | 0.33         | 0.59         | 0.67         |
| MMSE                       | 1.32           | 0.27         | 2.36         | 0.57         |
| MoCa                       | 4.49           | <b>0.002</b> | 3.81         | <b>0.006</b> |
